# Supplementary material
Source: PubMed Central journal article supplement (PMC3702160)
Supplement: NIHMS487592-supplement-01.pdf [file NIHMS487592-supplement-01.pdf]

Supplementary Table 1.

| Gene   | Primer               | Sequence                                                      |
|--------|----------------------|---------------------------------------------------------------|
| LINE   | LINENew-F            | 5'TTTTGAGTTAGGTGTGGGATATA3'                                   |
|        | LINENew-R-<br>Bio    | 5'AAAATCAAAAATCCCTTTC3'                                       |
| Nor 1  | LINENew-S            | 5'AGTTAGGTGTGGGATAGT3'                                        |
|        | Nor131F1             | 5'GAGTTGGATTGGTGAAGAGTT3'                                     |
|        | Nor131F2             | 5'GGGGTTAGGTAGTTAGTGG3'                                       |
|        | Nor131R              | 5'ACCAAACCCCTTCTAATT3'                                        |
|        | Nor131RU             | 5'GGGACACCGCTGATCGTTTACCAAACCCCTTCTAATT3'                     |
| Npm208 | Nor131S              | 5'TTAGGTTGTTGGGGTAA3'                                         |
|        | Npm208R1             | 5'CCCCCACACAACCTTACTAT3'                                      |
|        | Npm208RU             | 5'GGGACACCGCTGATCGTTTACCCCCACACAACCTTACTAT3'                  |
|        | Npm208F1             | 5'AGGAGGAAAGAATGGGAGAAGGG3'                                   |
| P15    | Npm208S              | 5'GTTAGAGGGGATGAGGT3'                                         |
|        | P15-314F             | 5'AGTTTAAGGGGGTGGGGAGA3'                                      |
|        | P15-314R             | 5'AAAACCTAAACTCAACTTCATTACCC3'                                |
|        | P15-159F2            | 5'TTAGAGAGAGGAGGGGTAGTGAGGATT3'                               |
|        | P15-<br>159R2Bio     | 5'TCCTTAACTCCCAACTTTTCTAAC3'                                  |
| CDH13  | P15-159S             | 5'TTAGGAGTTTTTTTTTAGAAGTA3'                                   |
|        | CDH13-186F           | 5'TTTGGGAAGTTGGTTGGTTG3'                                      |
|        | CDH13-186R           | 5'ACAACCCCTCTCCCTACCT3'                                       |
|        | CDH101F2             | 5'AGTTTGGTTTTTAAGGAAAATATGTTTAGT3'                            |
|        | CDH101R2-<br>bio     | 5'Biotin-AACCAAATTCTCCACTACATTTTATCC3'                        |
| PgrB   | Pgr207F              | 5'TGTGGGTGGTATTTTTAATGAGA3'                                   |
|        | Pgr207R              | 5'CCCCTCACTAAAACCCCTAAA3'                                     |
|        | PGRBF3               | 5'GAGAATTAGTTTTATTTGTTATTTGAGTGA3'                            |
| PgrA   | PgrBRbio             | 5'Biotin-CAACCCATTCCCAAAAAAATC3'                              |
|        | Pgr205F              | 5'TGATTGAGTTGAAGGTAAAG3'                                      |
|        | PGR205R              | 5'AAATCCTATCCCTAACAAA3'                                       |
|        | PGRA-F2              | 5'ATTGAGTTGAAGGTAAAGGGTTT3'                                   |
|        | Biotin-<br>Universal | 5'-<br>BiotinGGGACACCGCTGATCGTTTACRCTTCTACCRAATCAAACCTACTAA3' |
| Olig   | PgrA-S8F             | 5'GGATTTTTATTGTTGTGT3'                                        |
|        | Olig209F             | 5'TTTTAAAGGTGAGGATGTTTATTAT3'                                 |
|        | Olig209R             | 5'AAAAATCCAAACCCCTATAT3'                                      |
|        | Olig209RU            | 5'GGGACACCGCTGATCGTTTAAAAATCCAAACCCCTATAT3'                   |
|        | Biotin-<br>Universa  | 5'-<br>BiotinGGGACACCGCTGATCGTTTACRCTTCTACCRAATCAAACCTACTAA3' |
|        | Olig209Sgat          | 5'GTGAGGATGTTTATTATAGAT3'                                     |
